# Supplementary material for: Spondin2 is a new prognostic biomarker for lung adenocarcinoma
Source: PubMed Central journal article supplement (PMC5601735; doi:10.18632/oncotarget.19577), 2017-07-26
Supplement: oncotarget-08-59324-s001.pdf [file oncotarget-08-59324-s001.pdf]

## **Spondin2 is a new prognostic biomarker for lung adenocarcinoma**

### **SUPPLEMENTARY MATERIALS**

**Supplementary Table 1: Part of the medical records of the 280 patients, which were used in the IHC experiment**

**See Supplementary File 1**

**Supplementary Table 2: Part of the medical records of the 65 patients, which were used in the ELISA experiment**

**See Supplementary File 2**

Supplementary Table 3: Part of the records of the 20 healthy individuals, which were used in the ELISA experiment

| Age | Gender | Smoking |
|-----|--------|---------|
| ≥60 | female | no      |
| ≥60 | female | yes     |
| <60 | female | no      |
| ≥60 | female | no      |
| ≥60 | female | no      |
| <60 | male   | yes     |
| <60 | male   | no      |
| ≥60 | male   | no      |
| <60 | male   | no      |
| <60 | female | no      |
| ≥60 | male   | no      |
| <60 | male   | no      |
| <60 | male   | no      |
| <60 | male   | no      |
| <60 | male   | no      |
| ≥60 | male   | yes     |
| <60 | female | no      |
| ≥60 | male   | yes     |
| ≥60 | female | no      |
| <60 | female | no      |

Supplementary Table 4: Part of the medical records of the 30 patients, which were used in the PCR experiment

| Age | Gender | TNM | Differentiation | Pathological type | Smoking |
|-----|--------|-----|-----------------|-------------------|---------|
| ≥60 | male   | III | well            | solid             | no      |
| ≥60 | male   | III | well            | micropapillary    | no      |
| ≥60 | male   | IV  | well            | solid             | no      |
| <60 | female | IV  | well            | solid             | yes     |
| ≥60 | female | III | well            | micropapillary    | no      |
| <60 | male   | III | moderate        | papillary         | no      |
| ≥60 | male   | I   | poorly          | lepidic           | no      |
| ≥60 | male   | I   | poorly          | lepidic           | no      |
| ≥60 | female | I   | moderate        | acinar            | yes     |
| <60 | male   | I   | well            | micropapillary    | no      |
| ≥60 | female | I   | well            | micropapillary    | no      |
| ≥60 | male   | I   | well            | micropapillary    | no      |
| <60 | male   | III | well            | solid             | no      |
| ≥60 | female | I   | moderate        | acinar            | yes     |
| <60 | male   | I   | moderate        | papillary         | no      |
| <60 | male   | I   | well            | papillary         | no      |
| <60 | male   | I   | moderate        | acinar            | no      |
| ≥60 | male   | II  | well            | acinar            | yes     |
| ≥60 | female | I   | moderate        | papillary         | no      |
| <60 | male   | I   | well            | micropapillary    | no      |
| <60 | female | III | well            | micropapillary    | no      |
| <60 | female | I   | moderate        | acinar            | no      |
| ≥60 | male   | III | moderate        | acinar            | no      |
| <60 | male   | I   | moderate        | acinar            | yes     |
| ≥60 | female | I   | moderate        | acinar            | yes     |
| <60 | male   | I   | moderate        | papillary         | no      |
| <60 | female | I   | moderate        | papillary         | no      |
| <60 | female | II  | moderate        | papillary         | no      |
| <60 | male   | I   | poorly          | lepidic           | no      |
| <60 | male   | I   | poorly          | lepidic           | no      |
